# Supplementary material
Source: HighWire-hosted journal article supplement (http://molpharm.aspetjournals.org/highwire/filestream/77425/field_highwire_adjunct_files/0/Supplemental_101162.pdf)
Supplement: Supplemental_101162.pdf [file Supplemental_101162.pdf]

## Molecular Pharmacology

### Supplemental Data

# Phosphorylation of RS1 (*RSC1A1*) Steers Inhibition of Different Exocytotic Pathways for Glucose Transporter SGLT1 and Nucleoside Transporter CNT1 and a RS1 Derived Peptide Inhibits Glucose Absorption

Maike Veyhl-Wichmann, Alexandra Friedrich, Alexandra Vernaleken, Smriti Singh, Helmut Kipp, Valentin Gorboulev, Thorsten Keller, Chakravarthi Chintalapati, Rüdiger Pipkorn, Marçal Pastor-Anglada, Jürgen Groll, Hermann Koepsell

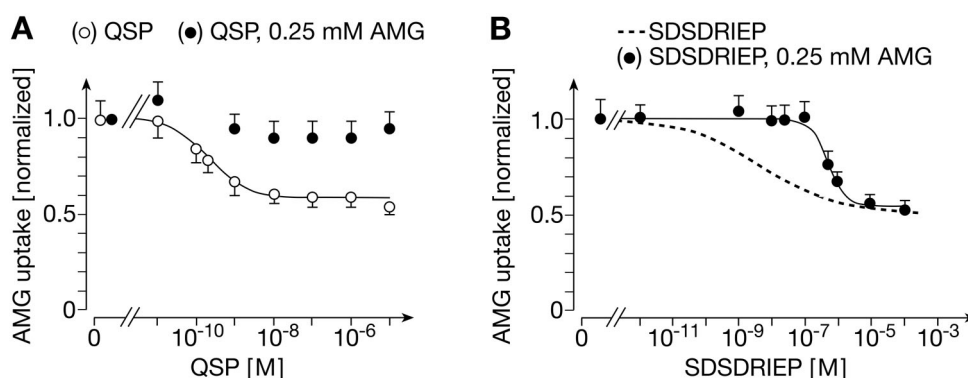

**Supplemental Fig. 1.** After injection of AMG into oocytes of *Xenopus laevis* down-regulation of hSGLT1 expressed AMG uptake by QSP (A) and SDSDRIEP (B) is blunted. Oocytes were injected with hSGLT1-cRNA and incubated two days for expression. Thereafter oocytes were injected with potassium-rich buffer without peptides (zero peptide concentration) or potassium-rich buffer containing different amounts of QSP (A) or SDSDRIEP (B). In part of the experiments 100 pmol AMG were injected together with the peptides. 1 h after peptide injection hSGLT1 mediated uptake of 50  $\mu$ M AMG was measured. Mean values of AMG uptake  $\pm$  SE of 24-27 cRNA injected oocytes from 3 independent experiments that were corrected for uptake in oocytes without hSGLT1 expression are shown. The curves were obtained by fitting the Hill equation to the compiled data sets. The individual uptake measurements observed after injection of SDSDRIEP without AMG are presented in Fig. 2B of the manuscript.
